# Supplementary material for: Census Tract Food Tweets and Chronic Disease Outcomes in the U.S., 2015–2018
Source: Int J Environ Res Public Health. 2019 Mar 18;16(6):975. doi: 10.3390/ijerph16060975 (PMC6466014; doi:10.3390/ijerph16060975)
Supplement: Supplementary file 1 [file ijerph-16-00975-s001.pdf]

# **SUPPLEMENTAL MATERIALS**

**Census Tract Food Tweets and Chronic Disease Outcomes in  
the U.S., 2015-2018**

**Table S1.** Twitter-derived food environment characteristics by state, United States 2015-2018.

| State | Total Tweets | Average Caloric Density | Percent of Food Tweets that Mention a Healthy Food | Percent of Food Tweets that Mention Fast Food |
|-------|--------------|-------------------------|----------------------------------------------------|-----------------------------------------------|
| AL    | 8025         | 248                     | 14.21                                              | 15.12                                         |
| AR    | 3421         | 261                     | 16.52                                              | 12.80                                         |
| AZ    | 17,743       | 245                     | 13.71                                              | 14.11                                         |
| CA    | 151,633      | 253                     | 16.45                                              | 10.37                                         |
| CO    | 18,766       | 235                     | 12.26                                              | 10.99                                         |
| CT    | 11,442       | 251                     | 14.55                                              | 14.97                                         |
| DC    | 8469         | 247                     | 18.01                                              | 8.78                                          |
| DE    | 2795         | 250                     | 17.57                                              | 15.21                                         |
| FL    | 74,393       | 242                     | 15.22                                              | 10.12                                         |
| GA    | 28,875       | 253                     | 17.69                                              | 12.01                                         |
| IA    | 6928         | 219                     | 13.31                                              | 11.30                                         |
| ID    | 3137         | 259                     | 12.85                                              | 23.33                                         |
| IL    | 38,482       | 256                     | 13.93                                              | 11.95                                         |
| IN    | 14,137       | 256                     | 13.85                                              | 15.05                                         |
| KS    | 5390         | 245                     | 14.03                                              | 15.27                                         |
| KY    | 8168         | 254                     | 12.43                                              | 21.57                                         |
| LA    | 13,159       | 239                     | 14.13                                              | 9.21                                          |
| MA    | 25,434       | 246                     | 14.82                                              | 9.09                                          |
| MD    | 17,731       | 237                     | 14.59                                              | 13.03                                         |
| ME    | 3499         | 225                     | 16.98                                              | 5.69                                          |
| MI    | 21,348       | 243                     | 11.72                                              | 18.94                                         |
| MN    | 12,634       | 234                     | 13.70                                              | 8.01                                          |
| MO    | 14,601       | 249                     | 11.49                                              | 14.12                                         |
| MS    | 3190         | 258                     | 20.19                                              | 10.47                                         |
| MT    | 1989         | 154                     | 10.51                                              | 8.09                                          |
| NC    | 28,463       | 253                     | 16.98                                              | 11.59                                         |
| ND    | 1031         | 249                     | 13.29                                              | 16.68                                         |
| NE    | 3585         | 226                     | 11.72                                              | 12.91                                         |
| NH    | 3276         | 235                     | 14.35                                              | 8.79                                          |
| NJ    | 28,398       | 249                     | 15.09                                              | 10.26                                         |
| NM    | 3145         | 254                     | 17.23                                              | 15.36                                         |
| NV    | 16,085       | 241                     | 13.62                                              | 11.78                                         |
| NY    | 85,085       | 248                     | 17.15                                              | 8.13                                          |
| OH    | 33,013       | 235                     | 17.67                                              | 11.51                                         |
| OK    | 6270         | 260                     | 14.64                                              | 14.19                                         |
| OR    | 16,352       | 225                     | 19.57                                              | 6.80                                          |
| PA    | 40,430       | 232                     | 14.82                                              | 7.38                                          |
| RI    | 3377         | 237                     | 13.86                                              | 9.30                                          |
| SC    | 13,075       | 245                     | 16.98                                              | 12.02                                         |
| SD    | 1347         | 230                     | 13.14                                              | 12.69                                         |
| TN    | 17,085       | 257                     | 16.89                                              | 11.29                                         |
| TX    | 69,337       | 260                     | 14.47                                              | 11.09                                         |
| UT    | 4530         | 260                     | 14.59                                              | 10.40                                         |
| VA    | 22,677       | 245                     | 14.72                                              | 14.44                                         |
| VT    | 1936         | 247                     | 15.39                                              | 11.05                                         |
| WA    | 22,275       | 232                     | 13.82                                              | 13.95                                         |
| WI    | 13,886       | 229                     | 12.00                                              | 11.21                                         |
| WV    | 2279         | 270                     | 12.11                                              | 19.53                                         |
| WY    | 748          | 237                     | 8.96                                               | 14.17                                         |

**Table S2.** Census tract level food environment characteristics and health outcomes (linear regression).

| Census Tract Characteristics             | Prevalence of Obesity |      |                 | Prevalence of Diabetes |      |                 | Prevalence of Hypertension |      |                 |
|------------------------------------------|-----------------------|------|-----------------|------------------------|------|-----------------|----------------------------|------|-----------------|
|                                          | %                     | SE   | <i>p</i> -value | %                      | SE   | <i>p</i> -value | %                          | SE   | <i>p</i> -value |
| <b>N = 18,504 <sup>a</sup></b>           |                       |      |                 |                        |      |                 |                            |      |                 |
| standardized mean calories <sup>b</sup>  | 0.18                  | 0.04 | <0.001 *        | 0.03                   | 0.02 | 0.095           | 0.15                       | 0.03 | <0.001 *        |
| standardized % healthy food <sup>b</sup> | −0.26                 | 0.04 | <0.001 *        | −0.03                  | 0.02 | 0.076           | −0.10                      | 0.04 | 0.008 *         |
| standardized % fast food <sup>b</sup>    | 0.16                  | 0.03 | <0.001 *        | 0.02                   | 0.01 | 0.073           | 0.12                       | 0.03 | <0.001 *        |

a. Census tract that have more than 10 tweets collected are included.

b. Twitter-derived food environment characteristics were standardized to have a mean of 0 and standard deviation of 1. Adjusted linear regression models were run for each outcome separately. Model controlled for census tract level demographics including population density, percent of 65 or older, percent of male, percent black, percent Hispanic, urban or rural area, percent relatives besides spouse and children living in households, percent unmarried cohabitating adults, household size, percent owner-occupied housing, and income inequality. Data Source: American Community Survey, CDC 500 cities.

**Table S3.** Twitter-derived food environment characteristics and sex-specific obesity rates, county level.

| <b>Table 1a: Food environment characteristics and male obesity rate</b> |       |      |                 | <b>Table 1b: Food environment characteristics and female obesity rate</b> |       |      |                 |
|-------------------------------------------------------------------------|-------|------|-----------------|---------------------------------------------------------------------------|-------|------|-----------------|
|                                                                         | %     | SE   | <i>p</i> -value |                                                                           | %     | SE   | <i>p</i> -value |
| (Intercept)                                                             | 31.22 | 0.07 | <0.001          | (Intercept)                                                               | 29.47 | 0.10 | <0.001          |
| standardized mean calories <sup>a</sup>                                 | 0.32  | 0.07 | <0.001          | standardized mean calories <sup>a</sup>                                   | 0.42  | 0.10 | <0.001          |
| <b>Table 2a: Healthy Food Mean, Men</b>                                 |       |      |                 | <b>Table 2b: Healthy Food Mean, Women</b>                                 |       |      |                 |
|                                                                         | %     | SE   | <i>p</i> -value |                                                                           | %     | SE   | <i>p</i> -value |
| (Intercept)                                                             | 31.22 | 0.07 | <0.001          | (Intercept)                                                               | 29.47 | 0.10 | <0.001          |
| standardized % healthy food <sup>a</sup>                                | 0.08  | 0.07 | 0.28            | standardized % healthy food <sup>a</sup>                                  | 0.21  | 0.10 | 0.03            |
| <b>Table 3a: Fast Food Mean, Men</b>                                    |       |      |                 | <b>Table 3b: Fast Food Mean, Women</b>                                    |       |      |                 |
|                                                                         | %     | SE   | <i>p</i> -value |                                                                           | %     | SE   | <i>p</i> -value |
| (Intercept)                                                             | 31.22 | 0.07 | <0.001          | (Intercept)                                                               | 29.47 | 0.10 | <0.001          |
| standardized % fast food <sup>a</sup>                                   | 0.13  | 0.07 | 0.07            | standardized % fast food <sup>a</sup>                                     | 0.24  | 0.10 | 0.01            |

N = 2841 Counties included in both male- and female specific models, <sup>a</sup>Twitter-derived food environment characteristics were standardized to have a mean of 0 and standard deviation of 1. Adjusted linear regression models were run for male- and female-specific obesity rates separately. Model controlled for census tract level demographics including population density, percent of 65 or older, percent of male, percent black, percent Hispanic, urban or rural area, percent relatives besides spouse and children living in households, percent unmarried cohabitating adults, household size, percent owner-occupied housing, and income inequality. Data Source: American Community Survey, CDC 500 cities. The Chow test assessing differences in coefficients for Twitter-derived variables in the separate regression models for male- and female-specific obesity rates was non-significant for all Twitter-derived food variables, suggesting similar strength of associations between Twitter-derived variables and obesity rate for men vs. women.
